# Supplementary material for: Identification of the Streptococcus pyogenes surface antigens recognised by pooled human immunoglobulin
Source: PubMed Central journal article supplement (PMC4623672; doi:10.1038/srep15825), 2015-10-28
Supplement: srep15825-s1.pdf [file srep15825-s1.pdf]

**Title:** Identification of the *Streptococcus pyogenes* surface antigens recognised by pooled human immunoglobulin

**Authors:** Mark Reglinski, Magdalena Gierula, Nicola N Lynskey, Robert J Edwards and  
\*Shiranee Sriskandan

**Affiliations:** Faculty of Medicine, Imperial College London, Hammersmith Campus, Du  
Cane Road, London, W12 0NN, United Kingdom

**\*Corresponding author:** Shiranee Sriskandan

**Address:** Section of Infectious Diseases, Imperial College London, Hammersmith Campus,  
London, W12 0NN

**Email:** s.sriskandan@imperial.ac.uk

## Supporting information

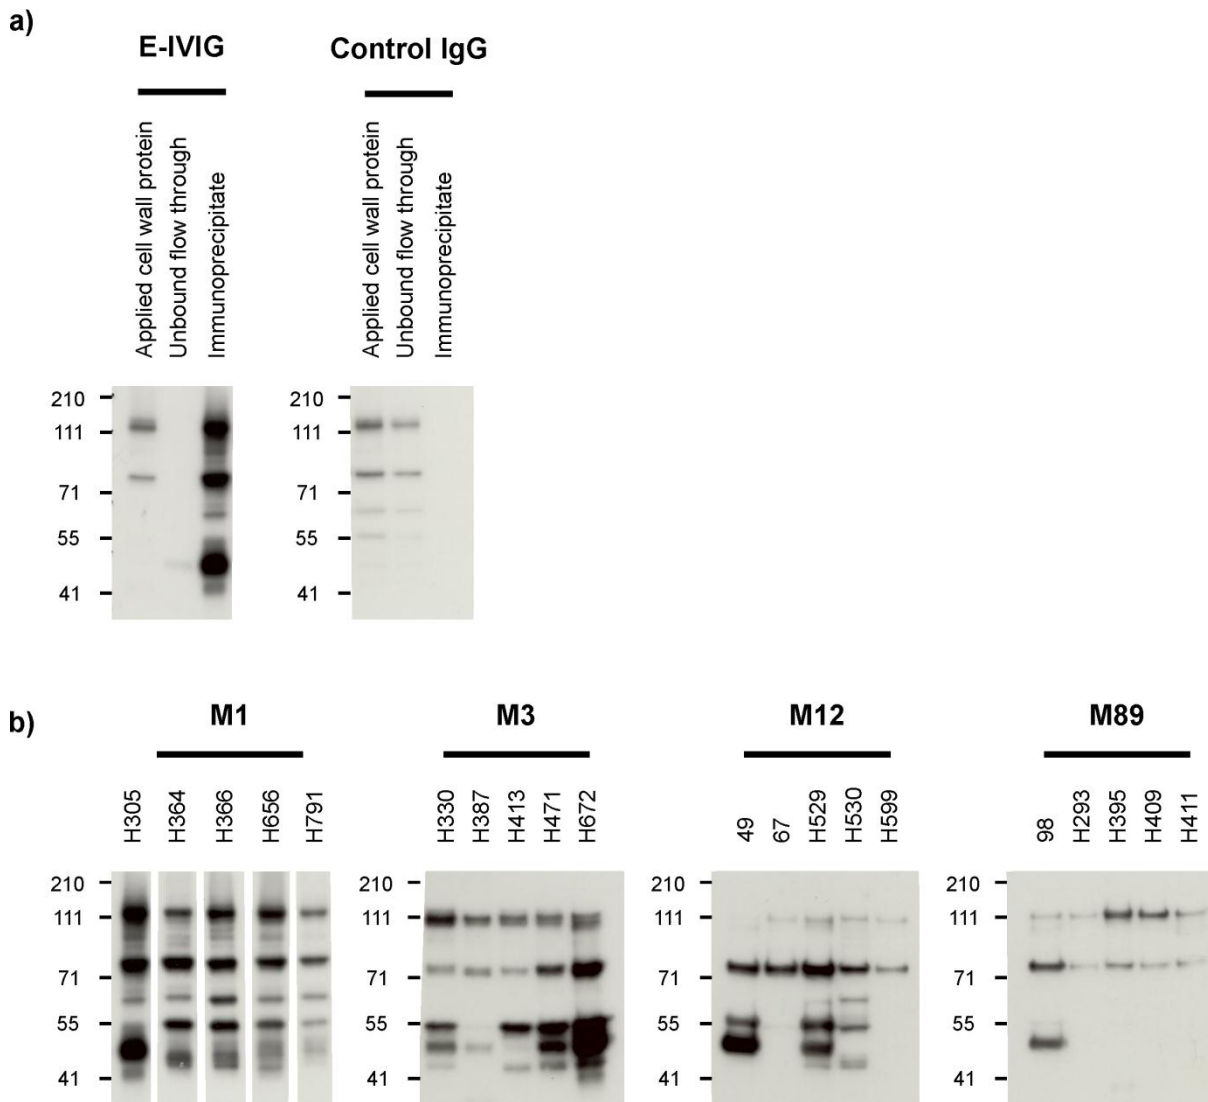

**Supplementary Figure 1: Purification of *S. pyogenes* surface antigens by E-IVIG immunoprecipitation.** A) In preliminary experiments antigenic proteins were purified from serotype M1 cell wall extract (strain H305) by immunoprecipitation using E-IVIG or polyclonal goat (control) IgG. Aliquots of the applied cell wall extract, the column flow through and the resulting immunoprecipitate were separated on 7% tris-acetate gels and subjected to immunoblot analysis using IVIG as the primary antibody. B) The immunoprecipitates recovered from the 20 strains selected for study were separated on 7% TA gels and subjected to immunoblot analysis using IVIG as the primary antibody. Molecular mass markers are given in kilodaltons.

**Supplementary Table 1: *S. pyogenes* isolates used in this study**

| <b>M type/Isolate</b> | <b>Source</b> | <b>Disease manifestation</b>       |
|-----------------------|---------------|------------------------------------|
| <b>M1</b>             |               |                                    |
| H305                  | Throat        | Scarlet fever                      |
| H364*                 | Lung          | Pneumonia/septic shock             |
| H366*                 | Blood         | Pneumonia/septic shock             |
| H656                  | Blood         | Bacteremia                         |
| H791                  | Blood         | Cellulitis                         |
| <b>M3</b>             |               |                                    |
| H330*                 | Blood         | Puerperal sepsis                   |
| H387                  | Throat        | Septic shock                       |
| H413                  | -             | Septic shock                       |
| H471*                 | Ear           | Septic shock                       |
| H672                  | Throat        | Tonsillitis                        |
| <b>M12</b>            |               |                                    |
| 49                    | Throat        | Tonsillitis                        |
| 67                    | Throat        | Tonsillitis                        |
| H529                  | Blood         | Septic shock                       |
| H530*                 | Blood         | Septic shock                       |
| H599*                 | Blood         | Bacteremia                         |
| <b>M89</b>            |               |                                    |
| 98 <sup>†</sup>       | Throat        | Tonsillitis                        |
| H293*                 | Muscle        | Necrotizing fasciitis/septic shock |
| H395 <sup>‡</sup>     | Blood         | Pneumonia                          |
| H409                  | Invasive      | Septic shock                       |
| H411                  | Blood         | Bacteremia                         |

\*Isolates used in opsonophagocytic uptake assays

<sup>†</sup>Genetically acapsular <sup>16</sup>

<sup>‡</sup>Hyperencapsulated *covS* mutant <sup>16</sup>

**Supplementary Table 2: The *S. pyogenes* antigens purified by E-IVIG immunoprecipitation.** Numbers represent the proportion of strains from which targets were identified.

| Uniprot identifier | Gene                                                 | Protein product                                                  | SEQUEST P-values (range)                  | M1  | M3  | M12 | M89 | Total |        |
|--------------------|------------------------------------------------------|------------------------------------------------------------------|-------------------------------------------|-----|-----|-----|-----|-------|--------|
| C5AP_STRP1         | <i>scpA</i> , SPy_2010, M5005_Spy1715                | C5a peptidase                                                    | 1x10 <sup>-30</sup> - 7x10 <sup>-10</sup> | 5/5 | 5/5 | 5/5 | 5/5 | 20/20 | 100%   |
| DNAK_STRP1         | <i>dnaK</i> , SPy_1760, M5005_Spy1498                | Chaperone protein DnaK                                           | 8x10 <sup>-15</sup> - 8x10 <sup>-8</sup>  | 5/5 | 5/5 | 5/5 | 5/5 | 20/20 |        |
| Q48Y96_STRP1       | <i>malE</i> , M5005_Spy1058, SPy_1294                | Maltose/maltodextrin-binding protein                             | 2x10 <sup>-16</sup> - 3x10 <sup>-10</sup> | 5/5 | 5/5 | 5/5 | 5/5 | 20/20 |        |
| Q490V0_STRP1       | <i>oppA</i> , M5005_Spy0249                          | Oligopeptide-binding protein                                     | 1x10 <sup>-30</sup> - 2x10 <sup>-10</sup> | 5/5 | 5/5 | 5/5 | 5/5 | 20/20 |        |
| Q491G2_STRP1       | M5005_Spy0137                                        | Nucleoside-binding protein                                       | 1x10 <sup>-30</sup> - 1x10 <sup>-15</sup> | 5/5 | 5/5 | 5/5 | 5/5 | 20/20 |        |
| Q99XX8_STRP1       | <i>pulA</i> , SPy_1972                               | Putative pullulanase                                             | 2x10 <sup>-14</sup> - 6x10 <sup>-8</sup>  | 5/5 | 5/5 | 5/5 | 5/5 | 20/20 |        |
| Q99ZH4_STRP1       | M5005_Spy0942, SPy_1228                              | Nucleoside-binding protein                                       | 1x10 <sup>-30</sup> - 7x10 <sup>-11</sup> | 5/5 | 5/5 | 5/5 | 5/5 | 20/20 |        |
| Q99ZW9_STRP1       | M5005_Spy0762, SPy_1037                              | Hypothetical membrane associated protein                         | 1x10 <sup>-30</sup> - 2x10 <sup>-13</sup> | 5/5 | 5/5 | 5/5 | 5/5 | 20/20 |        |
| Q9A0C0_STRP1       | M5005_Spy0651, SPy_0843                              | Cell surface protein                                             | 7x10 <sup>-14</sup> - 3x10 <sup>-7</sup>  | 5/5 | 5/5 | 5/5 | 5/5 | 20/20 |        |
| Q9A1H3_STRP1       | <i>prgA</i> , M5005_Spy0229, SPy_0269                | SpyAD                                                            | 2x10 <sup>-15</sup> - 4x10 <sup>-11</sup> | 5/5 | 5/5 | 5/5 | 5/5 | 20/20 |        |
| EFTS_STRP1         | <i>tsf</i> , SPy_2093, M5005_Spy1781                 | Elongation factor Ts                                             | 3x10 <sup>-15</sup> - 3x10 <sup>-8</sup>  | 5/5 | 5/5 | 4/5 | 5/5 | 19/20 | 70-95% |
| MTSA_STRP1         | <i>mtsA</i> , SPy_0453, M5005_Spy0368                | Metal ABC transporter substrate-binding lipoprotein              | 1x10 <sup>-30</sup> - 9x10 <sup>-10</sup> | 5/5 | 5/5 | 4/5 | 5/5 | 19/20 |        |
| PGK_STRP1          | <i>pgk</i> , SPy_1881, M5005_Spy1599                 | Phosphoglycerate kinase                                          | 6x10 <sup>-14</sup> - 5x10 <sup>-9</sup>  | 5/5 | 3/5 | 5/5 | 5/5 | 18/20 |        |
| Q99YL6_STRP1       | SPy_1643                                             | Putative uncharacterized protein                                 | 2x10 <sup>-9</sup> - 2x10 <sup>-6</sup>   | 4/5 | 4/5 | 5/5 | 5/5 | 18/20 |        |
| Q9A0C5_STRP1       | SPy_0836                                             | Putative uncharacterized protein                                 | 1x10 <sup>-10</sup> - 6x10 <sup>-5</sup>  | 5/5 | 3/5 | 5/5 | 5/5 | 18/20 |        |
| TACY_STRP1         | <i>slo</i> , SPy_0167, M5005_Spy0141                 | Streptolysin O                                                   | 1x10 <sup>-30</sup> - 5x10 <sup>-7</sup>  | 5/5 | 5/5 | 5/5 | 3/5 | 18/20 |        |
| PEPDB_STRP1        | <i>pepDB</i> , SPy_2066, M5005_Spy1758               | Probable dipeptidase B                                           | 1x10 <sup>-30</sup> - 2x10 <sup>-7</sup>  | 4/5 | 3/5 | 5/5 | 5/5 | 17/20 |        |
| Q7DAN2_STRP1       | <i>nga</i> , SPy_0165                                | Nicotine adenine dinucleotide glycohydrolase                     | 8x10 <sup>-15</sup> - 3x10 <sup>-11</sup> | 5/5 | 5/5 | 5/5 | 2/5 | 17/20 |        |
| Q9A1G0_STRP1       | <i>dacA</i> , <i>dacA2</i> , M5005_Spy0248, SPy_0292 | Penicillin-binding protein (D-alanyl-D-alanine carboxypeptidase) | 9x10 <sup>-12</sup> - 1x10 <sup>-4</sup>  | 2/5 | 5/5 | 5/5 | 5/5 | 17/20 |        |
| Q490K8_STRP1       | M5005_Spy0341                                        | SpyCEP                                                           | 3x10 <sup>-15</sup> - 1x10 <sup>-5</sup>  | 5/5 | 5/5 | 2/5 | 4/5 | 16/20 |        |
| Q99XU2_STRP1       | M5005_Spy1728, SPy_2032                              | Periplasmic component of efflux system                           | 3x10 <sup>-13</sup> - 9x10 <sup>-9</sup>  | 5/5 | 3/5 | 3/5 | 5/5 | 16/20 |        |
| Q48XJ9_STRP1       | M5005_Spy1308, SPy_1592                              | Sugar-binding protein                                            | 3x10 <sup>-15</sup> - 2x10 <sup>-5</sup>  | 5/5 | 3/5 | 1/5 | 5/5 | 14/20 |        |
| Q99XV0_STRP1       | <i>emm1</i> , SPy_2018                               | M protein type 1                                                 | 5x10 <sup>-13</sup> - 5x10 <sup>-6</sup>  | 5/5 | 5/5 | 4/5 | 0/5 | 14/20 |        |
| EFG_STRP1          | <i>fus</i> , SPy_0273, M5005_Spy0232                 | Elongation factor G                                              | 6x10 <sup>-16</sup> - 8x10 <sup>-5</sup>  | 5/5 | 2/5 | 2/5 | 4/5 | 13/20 | 50-65% |
| Q9A147_STRP1       | M5005_Spy0384, SPy_0469                              | Putative 42 kDa protein                                          | 7x10 <sup>-10</sup> - 7x10 <sup>-4</sup>  | 5/5 | 1/5 | 4/5 | 3/5 | 13/20 |        |
| PURA_STRP1         | <i>purA</i> , SPy_0160, M5005_Spy0136                | Adenylosuccinate synthetase                                      | 2x10 <sup>-13</sup> - 3x10 <sup>-5</sup>  | 5/5 | 2/5 | 2/5 | 3/5 | 12/20 |        |
| Q48Y78_STRP1       | <i>glnH</i> , M5005_Spy1076                          | Transporter                                                      | 1x10 <sup>-30</sup> - 4x10 <sup>-6</sup>  | 3/5 | 2/5 | 5/5 | 2/5 | 12/20 |        |
| Q99ZT1_STRP1       | M5005_Spy0818, SPy_1094                              | Polysaccharide deacetylase                                       | 8x10 <sup>-10</sup> - 8x10 <sup>-7</sup>  | 3/5 | 0/5 | 5/5 | 4/5 | 12/20 |        |
| PILIN_STRP1        | SPy_0128, M5005_Spy0109                              | Pilin                                                            | 1x10 <sup>-15</sup> - 1x10 <sup>-13</sup> | 5/5 | 5/5 | 1/5 | 0/5 | 11/20 |        |
| Q48ZH8_STRP1       | M5005_Spy0622                                        | Phosphoglycerol transferase                                      | 3x10 <sup>-13</sup> - 3x10 <sup>-5</sup>  | 5/5 | 1/5 | 1/5 | 4/5 | 11/20 |        |
| Q491J2_STRP1       | M5005_Spy0107                                        | Fibronectin-binding protein                                      | 1x10 <sup>-30</sup> - 6x10 <sup>-7</sup>  | 5/5 | 5/5 | 1/5 | 0/5 | 11/20 |        |
| Q99YQ4_STRP1       | SPy_1591                                             | Putative uncharacterized protein                                 | 2x10 <sup>-11</sup> - 2x10 <sup>-4</sup>  | 4/5 | 1/5 | 1/5 | 5/5 | 11/20 |        |
| Q99Z76_STRP1       | <i>inlA</i> , M5005_Spy1109, SPy_1361                | Internalin protein                                               | 1x10 <sup>-11</sup> - 1x10 <sup>-6</sup>  | 4/5 | 4/5 | 2/5 | 1/5 | 11/20 |        |
| SPEB_STRP1         | <i>speB</i> , SPy_2039, M5005_Spy1735                | Streptopain                                                      | 4x10 <sup>-15</sup> - 1x10 <sup>-6</sup>  | 5/5 | 1/5 | 1/5 | 4/5 | 11/20 |        |
| Q99ZX4_STRP1       | <i>hylA</i> , M5005_Spy0757, SPy_1032                | Extracellular hyaluronate lyase                                  | 2x10 <sup>-15</sup> - 7x10 <sup>-4</sup>  | 5/5 | 0/5 | 3/5 | 2/5 | 10/20 |        |
| Q9A0J7_STRP1       | M5005_Spy0571, SPy_0747                              | Endonuclease/exonuclease/phosphatase family protein              | 6x10 <sup>-14</sup> - 1x10 <sup>-6</sup>  | 5/5 | 1/5 | 2/5 | 2/5 | 10/20 |        |

**Supplementary Table 2 continued:**

| Uniprot identifier | Gene                                                                                 | Protein product                                        | SEQUEST P-values (range)                  | M1  | M3  | M12 | M89 | Total |        |
|--------------------|--------------------------------------------------------------------------------------|--------------------------------------------------------|-------------------------------------------|-----|-----|-----|-----|-------|--------|
| ENO_STRP1          | <i>eno</i> , <i>SPy_0731</i> ,<br><i>M5005_Spy0556</i>                               | Enolase                                                | 1x10 <sup>-30</sup> - 5x10 <sup>-9</sup>  | 4/5 | 1/5 | 2/5 | 2/5 | 9/20  |        |
| G3P_STRP1          | <i>gap</i> , <i>gapA</i> , <i>plr</i> ,<br><i>SPy_0274</i> ,<br><i>M5005_Spy0233</i> | Glyceraldehyde-3-phosphate dehydrogenase               | 1x10 <sup>-30</sup> - 1x10 <sup>-6</sup>  | 5/5 | 1/5 | 1/5 | 2/5 | 9/20  |        |
| Q491G0_STRP1       | <i>nga</i> ,<br><i>M5005_Spy0139</i>                                                 | NAD glycohydrolase                                     | 6x10 <sup>-13</sup> - 2x10 <sup>-7</sup>  | 4/5 | 3/5 | 2/5 | 0/5 | 9/20  |        |
| Q99ZB1_STRP1       | <i>malX</i> ,<br><i>M5005_Spy1067</i> ,<br><i>SPy_1306</i>                           | Maltose/maltodextrin-binding protein                   | 6x10 <sup>-15</sup> - 5x10 <sup>-9</sup>  | 5/5 | 0/5 | 0/5 | 4/5 | 9/20  |        |
| CH60_STRP1         | <i>groL</i> , <i>groEL</i> ,<br><i>SPy_2070</i> ,<br><i>M5005_Spy1761</i>            | 60 kDa chaperonin                                      | 6x10 <sup>-13</sup> - 1x10 <sup>-7</sup>  | 5/5 | 1/5 | 2/5 | 0/5 | 8/20  |        |
| Q9A1U2_STRP1       | <i>pbp1b</i> ,<br><i>M5005_Spy0082</i> ,<br><i>SPy_0097</i>                          | Multimodular transpeptidase-transglycosylase<br>PBP 1B | 2x10 <sup>-9</sup> - 1x10 <sup>-5</sup>   | 5/5 | 0/5 | 1/5 | 2/5 | 8/20  |        |
| Q9A209_STRP1       | <i>dnaI</i> ,<br><i>M5005_Spy0002</i> ,<br><i>SPy_0003</i>                           | DNA polymerase III subunit beta                        | 4x10 <sup>-9</sup> - 3x10 <sup>-7</sup>   | 5/5 | 0/5 | 3/5 | 0/5 | 8/20  |        |
| Q99XV4_STRP1       | <i>M5005_Spy1710</i> ,<br><i>SPy_2006</i>                                            | Streptococcal histidine triad protein                  | 7x10 <sup>-13</sup> - 3x10 <sup>-8</sup>  | 5/5 | 0/5 | 1/5 | 1/5 | 7/20  |        |
| Q9A1S0_STRP1       | <i>M5005_Spy0111</i> ,<br><i>SPy_0130</i>                                            | Putative uncharacterized protein                       | 6x10 <sup>-13</sup> - 8x10 <sup>-5</sup>  | 5/5 | 2/5 | 0/5 | 0/5 | 7/20  |        |
| STRP_STRP1         | <i>ska</i> , <i>SPy_1979</i> ,<br><i>M5005_Spy1684</i>                               | Streptokinase A                                        | 1x10 <sup>-30</sup> - 1x10 <sup>-4</sup>  | 4/5 | 2/5 | 1/5 | 0/5 | 7/20  |        |
| Q99Y99_STRP1       | <i>isp2</i> ,<br><i>M5005_Spy1531</i> ,<br><i>SPy_1801</i>                           | Immunogenic secreted protein                           | 3x10 <sup>-10</sup> - 1x10 <sup>-5</sup>  | 4/5 | 2/5 | 0/5 | 0/5 | 6/20  | 25-45% |
| Q99ZD1_STRP1       | <i>pyk</i> ,<br><i>M5005_Spy0988</i> ,<br><i>SPy_1282</i>                            | Pyruvate kinase                                        | 2x10 <sup>-11</sup> - 1x10 <sup>-5</sup>  | 4/5 | 0/5 | 1/5 | 1/5 | 6/20  |        |
| Q9A180_STRP1       | <i>prtS</i> , <i>SPy_0416</i>                                                        | Putative cell envelope proteinase                      | 7x10 <sup>-5</sup> - 8x10 <sup>-4</sup>   | 1/5 | 3/5 | 0/5 | 2/5 | 6/20  |        |
| Q9A1I9_STRP1       | <i>M5005_Spy0213</i> ,<br><i>SPy_0252</i>                                            | N-acetylneuraminate-binding protein                    | 5x10 <sup>-12</sup> - 9x10 <sup>-10</sup> | 5/5 | 0/5 | 0/5 | 1/5 | 6/20  |        |
| Q9A1Z8_STRP1       | <i>sibA</i> ,<br><i>M5005_Spy0017</i> ,<br><i>SPy_0019</i>                           | Putative secreted protein                              | 2x10 <sup>-13</sup> - 7x10 <sup>-8</sup>  | 5/5 | 0/5 | 1/5 | 0/5 | 6/20  |        |
| ADCA_STRP1         | <i>adcA</i> , <i>SPy_0714</i> ,<br><i>M5005_Spy0543</i>                              | Zinc-binding protein AdcA                              | 7x10 <sup>-12</sup> - 8x10 <sup>-7</sup>  | 4/5 | 0/5 | 1/5 | 0/5 | 5/20  |        |
| K6PF_STRP1         | <i>pfkA</i> , <i>pfk</i> ,<br><i>SPy_1283</i> ,<br><i>M5005_Spy0989</i>              | 6-phosphofructokinase                                  | 1x10 <sup>-30</sup> - 2x10 <sup>-4</sup>  | 4/5 | 0/5 | 1/5 | 0/5 | 5/20  |        |
| Q48WW7_STRP1       | <i>endoS</i> ,<br><i>M5005_Spy1540</i>                                               | Endo-beta-N-acetylglucosaminidase F2                   | 1x10 <sup>-15</sup> - 6x10 <sup>-7</sup>  | 1/5 | 0/5 | 1/5 | 3/5 | 5/20  |        |
| Q99XQ6_STRP1       | <i>pepO</i> , <i>SPy_2095</i>                                                        | Putative endopeptidase O                               | 2x10 <sup>-13</sup> - 6x10 <sup>-5</sup>  | 3/5 | 2/5 | 0/5 | 0/5 | 5/20  |        |
| Q99YF1_STRP1       | <i>lytR</i> ,<br><i>M5005_Spy1474</i> ,<br><i>SPy_1733</i>                           | Putative transcription regulator                       | 6x10 <sup>-14</sup> - 3x10 <sup>-9</sup>  | 5/5 | 0/5 | 0/5 | 0/5 | 5/20  |        |
| TIG_STRP1          | <i>tig</i> , <i>ropA</i> ,<br><i>SPy_1896</i> ,<br><i>M5005_Spy1612</i>              | Trigger factor                                         | 7x10 <sup>-8</sup> - 6x10 <sup>-5</sup>   | 5/5 | 0/5 | 0/5 | 0/5 | 5/20  |        |

**Supplementary Table 2 continued:**

| Uniprot identifier | Gene                                               | Protein product                                         | SEQUEST P-values (range)                  | M1  | M3  | M12 | M89 | Total |  |
|--------------------|----------------------------------------------------|---------------------------------------------------------|-------------------------------------------|-----|-----|-----|-----|-------|--|
| ALF_STRP1          | <i>fta</i> , SPy_1889, M5005_Spy1607               | Fructose-bisphosphate aldolase                          | 3x10 <sup>-13</sup> - 2x10 <sup>-5</sup>  | 0/5 | 3/5 | 0/5 | 1/5 | 4/20  |  |
| IMDH_STRP1         | <i>guaB</i> , SPy_2206, M5005_Spy1857              | Inosine-5'-monophosphate dehydrogenase                  | 2x10 <sup>-12</sup> - 3x10 <sup>-7</sup>  | 4/5 | 0/5 | 0/5 | 0/5 | 4/20  |  |
| Q48YY7_STRP1       | <i>dacA1</i> , M5005_Spy0817                       | D-alanyl-D-alanine carboxypeptidase                     | 4x10 <sup>-12</sup> - 4x10 <sup>-8</sup>  | 4/5 | 0/5 | 0/5 | 0/5 | 4/20  |  |
| Q99XZ6_STRP1       | M5005_Spy1659, SPy_1945                            | Putative uncharacterized protein                        | 3x10 <sup>-11</sup> - 4x10 <sup>-8</sup>  | 1/5 | 2/5 | 1/5 | 0/5 | 4/20  |  |
| Q99YN0_STRP1       | M5005_Spy1335, SPy_1625                            | Serine/threonine protein kinase                         | 5x10 <sup>-12</sup> - 1x10 <sup>-4</sup>  | 4/5 | 0/5 | 0/5 | 0/5 | 4/20  |  |
| Q9A156_STRP1       | SPy_0457                                           | Putative cyclophilin-type protein                       | 7x10 <sup>-7</sup> - 2x10 <sup>-5</sup>   | 0/5 | 0/5 | 4/5 | 0/5 | 4/20  |  |
| EFTU_STRP1         | <i>tuf</i> , SPy_0611, M5005_Spy0508               | Elongation factor Tu                                    | 1x10 <sup>-14</sup> - 3x10 <sup>-11</sup> | 3/5 | 0/5 | 0/5 | 0/5 | 3/20  |  |
| OTCC_STRP1         | <i>arcB</i> , SPy_1544, M5005_Spy1273              | Ornithine carbamoyltransferase, catabolic               | 2x10 <sup>-12</sup> - 8x10 <sup>-10</sup> | 2/5 | 0/5 | 0/5 | 1/5 | 3/20  |  |
| PRSA1_STRP1        | <i>prsA1</i> , SPy_1390, M5005_Spy1133             | Foldase protein prsA 1                                  | 2x10 <sup>-12</sup> - 3x10 <sup>-11</sup> | 3/5 | 0/5 | 0/5 | 0/5 | 3/20  |  |
| Q48ZN9_STRP1       | <i>epf</i> , M5005_Spy0561                         | Putative extracellular matrix binding protein           | 1x10 <sup>-7</sup> - 2x10 <sup>-5</sup>   | 2/5 | 1/5 | 0/5 | 0/5 | 3/20  |  |
| Q99ZB3_STRP1       | <i>amyA</i> , M5005_Spy1065, SPy_1302              | Alpha-amylase                                           | 3x10 <sup>-15</sup> - 8x10 <sup>-5</sup>  | 3/5 | 0/5 | 0/5 | 0/5 | 3/20  |  |
| Q9A0A2_STRP1       | M5005_Spy0678, SPy_0872                            | 5'-nucleotidase                                         | 5x10 <sup>-9</sup> - 3x10 <sup>-5</sup>   | 2/5 | 1/5 | 0/5 | 0/5 | 3/20  |  |
| Q9A1H5_STRP1       | <i>cbf</i> , M5005_Spy0227, SPy_0267               | CMP-binding factor                                      | 7x10 <sup>-8</sup> - 3x10 <sup>-7</sup>   | 3/5 | 0/5 | 0/5 | 0/5 | 3/20  |  |
| LDH_STRP1          | <i>ldh</i> , SPy_1151, M5005_Spy0873               | L-lactate dehydrogenase                                 | 5x10 <sup>-9</sup> - 6x10 <sup>-5</sup>   | 2/5 | 0/5 | 0/5 | 0/5 | 2/20  |  |
| Q48WD4_STRP1       | <i>isp</i> , M5005_Spy1723                         | Immunogenic secreted protein                            | 6x10 <sup>-6</sup> - 7x10 <sup>-6</sup>   | 2/5 | 0/5 | 0/5 | 0/5 | 2/20  |  |
| Q48YT2_STRP1       | <i>nox</i> , M5005_Spy0872                         | NADH oxidase H2O-forming                                | 1x10 <sup>-8</sup> - 6x10 <sup>-8</sup>   | 2/5 | 0/5 | 0/5 | 0/5 | 2/20  |  |
| Q48Z64_STRP1       | <i>cpsFQ</i> , M5005_Spy0736                       | dTDP-glucose 4,6-dehydratase                            | 2x10 <sup>-7</sup> - 4x10 <sup>-4</sup>   | 2/5 | 0/5 | 0/5 | 0/5 | 2/20  |  |
| Q490V2_STRP1       | M5005_Spy0247                                      | Ribonuclease                                            | 8x10 <sup>-10</sup> - 4x10 <sup>-9</sup>  | 2/5 | 0/5 | 0/5 | 0/5 | 2/20  |  |
| Q99XV9_STRP1       | <i>dppA</i> , M5005_Spy1704, SPy_2000              | Dipeptide-binding protein                               | 8x10 <sup>-7</sup> - 1x10 <sup>-6</sup>   | 2/5 | 0/5 | 0/5 | 0/5 | 2/20  |  |
| Q99YA0_STRP1       | M5005_Spy1530, SPy_1798                            | Putative Fe3+-siderophore transport protein             | 2x10 <sup>-12</sup> - 2x10 <sup>-10</sup> | 2/5 | 0/5 | 0/5 | 0/5 | 2/20  |  |
| Q99YA2_STRP1       | M5005_Spy1528, SPy_1795                            | Ferrichrome-binding protein                             | 6x10 <sup>-12</sup> - 8x10 <sup>-8</sup>  | 1/5 | 1/5 | 0/5 | 0/5 | 2/20  |  |
| Q99ZN4_STRP1       | M5005_Spy0875, SPy_1154                            | Sortase                                                 | 8x10 <sup>-8</sup> - 1x10 <sup>-6</sup>   | 1/5 | 0/5 | 0/5 | 1/5 | 2/20  |  |
| G6PI_STRP1         | <i>pgi</i> , SPy_0215, M5005_Spy0185               | Glucose-6-phosphate isomerase                           | 6x10 <sup>-8</sup>                        | 0/5 | 0/5 | 0/5 | 1/5 | 1/20  |  |
| Q48WD9_STRP1       | <i>sic1.01</i> , M5005_Spy1718                     | Streptococcal inhibitor of complement                   | 1x10 <sup>-30</sup>                       | 1/5 | 0/5 | 0/5 | 0/5 | 1/20  |  |
| Q48X28_STRP1       | <i>manL</i> , M5005_Spy1479                        | PTS system, mannose-specific IIB component              | 6x10 <sup>-11</sup>                       | 1/5 | 0/5 | 0/5 | 0/5 | 1/20  |  |
| Q7DAL3_STRP1       | <i>scl</i> , <i>sclA</i> , M5005_Spy1687, SPy_1983 | Collagen-like surface protein                           | 1x10 <sup>-7</sup>                        | 1/5 | 0/5 | 0/5 | 0/5 | 1/20  |  |
| Q7DAM2_STRP1       | <i>mac</i> , M5005_Spy0668, SPy_0861               | IgG-degrading protease                                  | 7x10 <sup>-11</sup>                       | 1/5 | 0/5 | 0/5 | 0/5 | 1/20  |  |
| Q99Z26_STRP1       | <i>mf3</i> , SPy_1436                              | Putative deoxyribonuclease                              | 4x10 <sup>-10</sup>                       | 1/5 | 0/5 | 0/5 | 0/5 | 1/20  |  |
| Q99Z67_STRP1       | <i>gapN</i> , M5005_Spy1119, SPy_1371              | NADP-dependent glyceraldehyde-3-phosphate dehydrogenase | 3x10 <sup>-8</sup>                        | 1/5 | 0/5 | 0/5 | 0/5 | 1/20  |  |
| Q99ZU1_STRP1       | M5005_Spy0793, SPy_1070                            | Putative dipeptidase                                    | 2x10 <sup>-9</sup>                        | 0/5 | 0/5 | 0/5 | 1/5 | 1/20  |  |
| Q99ZX5_STRP1       | <i>acol</i> , M5005_Spy0755, SPy_1031              | Dihydroliipoamide dehydrogenase                         | 6x10 <sup>-4</sup>                        | 1/5 | 0/5 | 0/5 | 0/5 | 1/20  |  |
| Q9A1E5_STRP1       | M5005_Spy0270, SPy_0317                            | ABC transporter substrate-binding protein               | 9x10 <sup>-7</sup>                        | 0/5 | 0/5 | 1/5 | 0/5 | 1/20  |  |
| Q9A068_STRP1       | <i>bcaT</i> , M5005_Spy0713, SPy_0911              | Branched-chain-amino-acid aminotransferase              | 6x10 <sup>-6</sup>                        | 1/5 | 0/5 | 0/5 | 0/5 | 1/20  |  |
| Q9A146_STRP1       | SPy_0470                                           | 67 kDa Myosin-crossreactive streptococcal antigen       | 9x10 <sup>-6</sup>                        | 1/5 | 0/5 | 0/5 | 0/5 | 1/20  |  |
| Q9A1E4_STRP1       | M5005_Spy0271, SPy_0319                            | ABC transporter substrate-binding protein               | 1x10 <sup>-6</sup>                        | 0/5 | 0/5 | 0/5 | 1/5 | 1/20  |  |
| RPOA_STRP1         | <i>rpoA</i> , SPy_0080, M5005_Spy0070              | DNA-directed RNA polymerase subunit alpha               | 6x10 <sup>-6</sup>                        | 1/5 | 0/5 | 0/5 | 0/5 | 1/20  |  |
| SYA_STRP1          | <i>alaS</i> , SPy_1389, M5005_Spy1132              | Alanyl-tRNA synthetase                                  | 1x10 <sup>-5</sup>                        | 1/5 | 0/5 | 0/5 | 0/5 | 1/20  |  |
| SYS_STRP1          | <i>serS</i> , SPy_1742, M5005_Spy1483              | Seryl-tRNA synthetase                                   | 2x10 <sup>-10</sup>                       | 1/5 | 0/5 | 0/5 | 0/5 | 1/20  |  |
| Y652_STRP1         | SPy_0652, M5005_Spy0539                            | UPF0042 nucleotide-binding protein                      | 9x10 <sup>-10</sup>                       | 1/5 | 0/5 | 0/5 | 0/5 | 1/20  |  |

<25%

**Supplementary Table 3: The *S. pyogenes* antigens purified by comparative immunoprecipitation.** Numbers represent the proportion of strains from which targets were identified. Targets identified from  $\geq 75\%$  of strains using one or more E-IVIG preparations are displayed.

| Uniprot Identifier | Protein product                                     | Endobulin |     |     |     |       | Intratect |     |     |     |       | Privigen |     |     |     |       |
|--------------------|-----------------------------------------------------|-----------|-----|-----|-----|-------|-----------|-----|-----|-----|-------|----------|-----|-----|-----|-------|
|                    |                                                     | M1        | M12 | M3  | M89 | Total | M1        | M12 | M3  | M89 | Total | M1       | M12 | M3  | M89 | Total |
| C5AP_STRP1         | C5a peptidase                                       | 2/2       | 2/2 | 2/2 | 2/2 | 8/8   | 2/2       | 2/2 | 2/2 | 2/2 | 8/8   | 2/2      | 2/2 | 2/2 | 2/2 | 8/8   |
| DNAK_STRP1         | Chaperone protein DnaK                              | 2/2       | 2/2 | 2/2 | 2/2 | 8/8   | 2/2       | 2/2 | 2/2 | 2/2 | 8/8   | 2/2      | 2/2 | 2/2 | 2/2 | 8/8   |
| EFTS_STRP1         | Elongation factor Ts                                | 2/2       | 2/2 | 2/2 | 2/2 | 8/8   | 2/2       | 2/2 | 2/2 | 2/2 | 8/8   | 2/2      | 2/2 | 2/2 | 2/2 | 8/8   |
| MTSA_STRP1         | Metal ABC transporter substrate-binding lipoprotein | 2/2       | 2/2 | 2/2 | 2/2 | 8/8   | 2/2       | 2/2 | 2/2 | 2/2 | 8/8   | 2/2      | 2/2 | 2/2 | 2/2 | 8/8   |
| PGK_STRP1          | Phosphoglycerate kinase                             | 2/2       | 2/2 | 2/2 | 2/2 | 8/8   | 2/2       | 2/2 | 2/2 | 2/2 | 8/8   | 2/2      | 2/2 | 2/2 | 2/2 | 8/8   |
| Q48Y96_STRP1       | Maltose/maltodextrin-binding protein                | 2/2       | 2/2 | 2/2 | 2/2 | 8/8   | 2/2       | 2/2 | 2/2 | 2/2 | 8/8   | 2/2      | 2/2 | 2/2 | 2/2 | 8/8   |
| Q490V0_STRP1       | Oligopeptide-binding protein                        | 2/2       | 2/2 | 2/2 | 2/2 | 8/8   | 2/2       | 2/2 | 2/2 | 2/2 | 8/8   | 2/2      | 2/2 | 2/2 | 2/2 | 8/8   |
| Q491G2_STRP1       | Nucleoside-binding protein                          | 2/2       | 2/2 | 2/2 | 2/2 | 8/8   | 2/2       | 2/2 | 2/2 | 2/2 | 8/8   | 2/2      | 2/2 | 2/2 | 2/2 | 8/8   |
| Q7DAN2_STRP1       | Nicotine adenine dinucleotide glycohydrolase        | 2/2       | 2/2 | 2/2 | 2/2 | 8/8   | 2/2       | 2/2 | 2/2 | 2/2 | 8/8   | 2/2      | 2/2 | 2/2 | 2/2 | 8/8   |
| Q99XX8_STRP1       | Putative pullulanase                                | 2/2       | 2/2 | 2/2 | 2/2 | 8/8   | 2/2       | 2/2 | 2/2 | 2/2 | 8/8   | 2/2      | 2/2 | 2/2 | 2/2 | 8/8   |
| Q99ZH4_STRP1       | Nucleoside-binding protein                          | 2/2       | 2/2 | 2/2 | 2/2 | 8/8   | 2/2       | 2/2 | 2/2 | 2/2 | 8/8   | 2/2      | 2/2 | 2/2 | 2/2 | 8/8   |
| Q99ZW9_STRP1       | Hypothetical membrane associated protein            | 2/2       | 2/2 | 2/2 | 2/2 | 8/8   | 2/2       | 2/2 | 2/2 | 2/2 | 8/8   | 2/2      | 2/2 | 2/2 | 2/2 | 8/8   |
| Q9A0C0_STRP1       | Cell surface protein                                | 2/2       | 2/2 | 2/2 | 2/2 | 8/8   | 2/2       | 2/2 | 2/2 | 2/2 | 8/8   | 2/2      | 2/2 | 2/2 | 2/2 | 8/8   |
| Q9A0J7_STRP1       | Endonuclease/exonuclease/phosphatase family protein | 2/2       | 2/2 | 2/2 | 2/2 | 8/8   | 2/2       | 2/2 | 2/2 | 2/2 | 8/8   | 2/2      | 2/2 | 2/2 | 2/2 | 8/8   |
| Q9A1G0_STRP1       | Penicillin-binding protein                          | 2/2       | 2/2 | 2/2 | 2/2 | 8/8   | 2/2       | 2/2 | 2/2 | 2/2 | 8/8   | 2/2      | 2/2 | 2/2 | 2/2 | 8/8   |
| Q9A1H3_STRP1       | SpyAD                                               | 2/2       | 2/2 | 2/2 | 2/2 | 8/8   | 2/2       | 2/2 | 2/2 | 2/2 | 8/8   | 2/2      | 2/2 | 2/2 | 2/2 | 8/8   |
| Q9A1Z8_STRP1       | Putative secreted protein                           | 2/2       | 2/2 | 2/2 | 2/2 | 8/8   | 2/2       | 2/2 | 2/2 | 2/2 | 8/8   | 2/2      | 2/2 | 2/2 | 2/2 | 8/8   |
| TACY_STRP1         | Streptolysin O                                      | 2/2       | 2/2 | 2/2 | 2/2 | 8/8   | 2/2       | 2/2 | 2/2 | 2/2 | 8/8   | 2/2      | 2/2 | 2/2 | 2/2 | 8/8   |

**Supplementary Table 3 continued:**

| Uniprot Identifier | Protein product                          | Endobulin |     |     |     |       | Intratect |     |     |     |       | Privigen |     |     |     |       |
|--------------------|------------------------------------------|-----------|-----|-----|-----|-------|-----------|-----|-----|-----|-------|----------|-----|-----|-----|-------|
|                    |                                          | M1        | M12 | M3  | M89 | Total | M1        | M12 | M3  | M89 | Total | M1       | M12 | M3  | M89 | Total |
| G3P_STRP1          | Glyceraldehyde-3-phosphate dehydrogenase | 1/2       | 2/2 | 2/2 | 2/2 | 7/8   | 1/2       | 2/2 | 2/2 | 2/2 | 7/8   | 1/2      | 2/2 | 2/2 | 2/2 | 7/8   |
| PILIN_STRP1        | Pilin                                    | 2/2       | 2/2 | 2/2 | 1/2 | 7/8   | 2/2       | 2/2 | 2/2 | 1/2 | 7/8   | 2/2      | 2/2 | 2/2 | 1/2 | 7/8   |
| Q490K8_STRP1       | SpyCEP                                   | 1/2       | 2/2 | 2/2 | 2/2 | 7/8   | 1/2       | 2/2 | 2/2 | 2/2 | 7/8   | 1/2      | 2/2 | 2/2 | 2/2 | 7/8   |
| Q99XV0_STRP1       | M protein type 1                         | 2/2       | 2/2 | 2/2 | 1/2 | 7/8   | 2/2       | 2/2 | 2/2 | 1/2 | 7/8   | 2/2      | 2/2 | 2/2 | 1/2 | 7/8   |
| Q99ZT1_STRP1       | Polysaccharide deacetylase               | 2/2       | 2/2 | 1/2 | 2/2 | 7/8   | 2/2       | 2/2 | 1/2 | 2/2 | 7/8   | 2/2      | 2/2 | 1/2 | 2/2 | 7/8   |
| Q9A156_STRP1       | Putative cyclophilin-type protein        | 1/2       | 2/2 | 2/2 | 2/2 | 7/8   | 1/2       | 1/2 | 2/2 | 1/2 | 5/8   | 2/2      | 2/2 | 1/2 | 2/2 | 7/8   |
| PEPDB_STRP1        | Probable dipeptidase B                   | 2/2       | 1/2 | 1/2 | 2/2 | 6/8   | 2/2       | 1/2 | 2/2 | 1/2 | 6/8   | 2/2      | 1/2 | 1/2 | 2/2 | 6/8   |
| Q99XV4_STRP1       | Streptococcal histidine triad protein    | 2/2       | 1/2 | 1/2 | 2/2 | 6/8   | 2/2       | 1/2 | 0/2 | 2/2 | 5/8   | 2/2      | 1/2 | 1/2 | 1/2 | 5/8   |
| Q99YL6_STRP1       | Putative uncharacterized protein         | 1/2       | 1/2 | 1/2 | 2/2 | 5/8   | 2/2       | 1/2 | 0/2 | 2/2 | 5/8   | 1/2      | 2/2 | 1/2 | 2/2 | 6/8   |
| Q9A0C5_STRP1       | Putative uncharacterized protein         | 2/2       | 0/2 | 1/2 | 2/2 | 5/8   | 2/2       | 0/2 | 1/2 | 1/2 | 4/8   | 2/2      | 2/2 | 1/2 | 2/2 | 7/8   |
| Q99XU2_STRP1       | Periplasmic component of efflux system   | 1/2       | 1/2 | 0/2 | 2/2 | 4/8   | 0/2       | 1/2 | 0/2 | 2/2 | 3/8   | 2/2      | 1/2 | 2/2 | 2/2 | 7/8   |
| Q9A147_STRP1       | Putative 42 kDa protein                  | 0/2       | 1/2 | 2/2 | 0/2 | 3/8   | 2/2       | 2/2 | 2/2 | 1/2 | 7/8   | 0/2      | 2/2 | 2/2 | 0/2 | 4/8   |
